# Supplementary material for: Form, function, and divergence of a generic fin shape in small cetaceans
Source: PLoS One. 2021 Aug 11;16(8):e0255464. doi: 10.1371/journal.pone.0255464 (PMC8357180; doi:10.1371/journal.pone.0255464)
Supplement: S6 File — (XLSX) [file pone.0255464.s022.xlsx]

## Sheet: Fluke's Section #1
B. acutorostrata fluke Section #1		D. delphis fluke Section #1		G. melas fluke Section #1		L. acutus fluke Section #1		L. albirostris fluke Section #1		P. phocoena tail fluke Section #1		T. truncatus fluke Section #1		S8035 AIRFOIL 15%		SD8020-010-88 AIRFOIL 15%
X_Coord	Y_Coord	X_Coord	Y_Coord	X_Coord	Y_Coord	X_Coord	Y_Coord	X_Coord	Y_Coord	X_Coord	Y_Coord	X_Coord	Y_Coord	X_Coord	Y_Coord	X_Coord	Y_Coord
1	0	1	0	1	0	1	0	1	0	1	0	1	0	1	0	1	0
0.997261	-0.00375224	0.997261	-0.00409956	0.997261	-0.00484832	0.997261	-0.00400636	0.997261	-0.0026609	0.997261	-0.00428903	0.997261	-0.00373073	0.997261	-0.000207655	0.997261	-0.000303967
0.989074	-0.00683968	0.989074	-0.00667875	0.989074	-0.00792912	0.989074	-0.0066973	0.989074	-0.00542417	0.989074	-0.00706397	0.989074	-0.00641889	0.989074	-0.00142631	0.989074	-0.00147376
0.975528	-0.00915068	0.975528	-0.00883572	0.975528	-0.0111315	0.975528	-0.00818458	0.975528	-0.00804781	0.975528	-0.00911166	0.975528	-0.00844825	0.975528	-0.00387463	0.975528	-0.00390839
0.956773	-0.0115976	0.956773	-0.0114273	0.956773	-0.0144188	0.956773	-0.00998551	0.956773	-0.0113276	0.956773	-0.0121685	0.956773	-0.0109267	0.956773	-0.00694722	0.956773	-0.00742812
0.933013	-0.0145687	0.933013	-0.0144736	0.933013	-0.0181545	0.933013	-0.0125552	0.933013	-0.0155272	0.933013	-0.0159692	0.933013	-0.0142328	0.933013	-0.0102751	0.933013	-0.0114302
0.904508	-0.0183588	0.904508	-0.018164	0.904508	-0.0225419	0.904508	-0.0162976	0.904508	-0.0206555	0.904508	-0.0205509	0.904508	-0.018616	0.904508	-0.0140941	0.904508	-0.0156886
0.871572	-0.0237868	0.871572	-0.0225956	0.871572	-0.0284919	0.871572	-0.0217473	0.871572	-0.0266962	0.871572	-0.0259421	0.871572	-0.0243014	0.871572	-0.0184997	0.871572	-0.0204415
0.834565	-0.0307664	0.834565	-0.0282789	0.834565	-0.0358759	0.834565	-0.0294912	0.834565	-0.0338256	0.834565	-0.032629	0.834565	-0.0315171	0.834565	-0.0235877	0.834565	-0.0256678
0.793893	-0.0392847	0.793893	-0.0353668	0.793893	-0.0444367	0.793893	-0.0397194	0.793893	-0.0426568	0.793893	-0.0408726	0.793893	-0.0400952	0.793893	-0.0292683	0.793893	-0.0313179
0.75	-0.0492368	0.75	-0.0441955	0.75	-0.0538331	0.75	-0.0520506	0.75	-0.0539549	0.75	-0.0509081	0.75	-0.050231	0.75	-0.035311	0.75	-0.0372871
0.703368	-0.0600993	0.703368	-0.0539793	0.703368	-0.0636942	0.703368	-0.0655039	0.703368	-0.0665249	0.703368	-0.0622558	0.703368	-0.0612467	0.703368	-0.0415707	0.703368	-0.0433699
0.654508	-0.070932	0.654508	-0.0641948	0.654508	-0.0738173	0.654508	-0.078382	0.654508	-0.078786	0.654508	-0.0740439	0.654508	-0.0724072	0.654508	-0.0478071	0.654508	-0.0493743
0.603956	-0.0811524	0.603956	-0.0737994	0.603956	-0.0835861	0.603956	-0.0891434	0.603956	-0.0902834	0.603956	-0.085247	0.603956	-0.083131	0.603956	-0.0538688	0.603956	-0.0551218
0.552264	-0.0903709	0.552264	-0.0824612	0.552264	-0.0926071	0.552264	-0.0984593	0.552264	-0.100393	0.552264	-0.0949397	0.552264	-0.092958	0.552264	-0.059492	0.552264	-0.0604491
0.5	-0.0978255	0.5	-0.0896644	0.5	-0.100357	0.5	-0.106056	0.5	-0.108053	0.5	-0.102916	0.5	-0.10135	0.5	-0.064526	0.5	-0.0651797
0.447736	-0.103392	0.447736	-0.095655	0.447736	-0.106243	0.447736	-0.111643	0.447736	-0.113099	0.447736	-0.109187	0.447736	-0.10727	0.447736	-0.0687396	0.447736	-0.0691324
0.396044	-0.106358	0.396044	-0.100252	0.396044	-0.110203	0.396044	-0.114776	0.396044	-0.115665	0.396044	-0.113468	0.396044	-0.110678	0.396044	-0.0720046	0.396044	-0.0721789
0.345491	-0.106813	0.345491	-0.103395	0.345491	-0.111697	0.345491	-0.115398	0.345491	-0.116922	0.345491	-0.115183	0.345491	-0.112111	0.345491	-0.0741151	0.345491	-0.0741946
0.296632	-0.1053	0.296632	-0.104714	0.296632	-0.111072	0.296632	-0.113709	0.296632	-0.116158	0.296632	-0.114214	0.296632	-0.11192	0.296632	-0.0749858	0.296632	-0.0750311
0.25	-0.102083	0.25	-0.104053	0.25	-0.108289	0.25	-0.110161	0.25	-0.113028	0.25	-0.110809	0.25	-0.110222	0.25	-0.0744311	0.25	-0.0745811
0.206107	-0.097265	0.206107	-0.101381	0.206107	-0.103734	0.206107	-0.105103	0.206107	-0.107278	0.206107	-0.105174	0.206107	-0.106531	0.206107	-0.0724564	0.206107	-0.0727316
0.165435	-0.091127	0.165435	-0.0965708	0.165435	-0.0972411	0.165435	-0.0983722	0.165435	-0.0997858	0.165435	-0.097503	0.165435	-0.100563	0.165435	-0.0689117	0.165435	-0.0694248
0.128428	-0.0836158	0.128428	-0.0896035	0.128428	-0.0889481	0.128428	-0.0894281	0.128428	-0.0908698	0.128428	-0.0882083	0.128428	-0.092636	0.128428	-0.0638972	0.128428	-0.0646137
0.0954915	-0.0746125	0.0954915	-0.0805248	0.0954915	-0.0790314	0.0954915	-0.0784444	0.0954915	-0.0808896	0.0954915	-0.0773328	0.0954915	-0.0832038	0.0954915	-0.057371	0.0954915	-0.0583027
0.0669873	-0.0643238	0.0669873	-0.0694139	0.0669873	-0.0674208	0.0669873	-0.0658553	0.0669873	-0.0698379	0.0669873	-0.0652344	0.0669873	-0.0723984	0.0669873	-0.04951	0.0669873	-0.0505286
0.0432273	-0.0526813	0.0432273	-0.0571685	0.0432273	-0.0542798	0.0432273	-0.052321	0.0432273	-0.0577088	0.0432273	-0.05295	0.0432273	-0.0598026	0.0432273	-0.0403884	0.0432273	-0.0414263
0.0244717	-0.04013	0.0244717	-0.0438513	0.0244717	-0.0403507	0.0244717	-0.0384011	0.0244717	-0.0447039	0.0244717	-0.0407379	0.0244717	-0.0452491	0.0244717	-0.0303625	0.0244717	-0.0311588
0.0109262	-0.0266027	0.0109262	-0.0293774	0.0109262	-0.026296	0.0109262	-0.0248013	0.0109262	-0.0309518	0.0109262	-0.0278525	0.0109262	-0.0292863	0.0109262	-0.0197753	0.0109262	-0.020235
0.00273905	-0.0127706	0.00273905	-0.0151117	0.00273905	-0.012926	0.00273905	-0.0117328	0.00273905	-0.0174855	0.00273905	-0.0142243	0.00273905	-0.0134123	0.00273905	-0.00924667	0.00273905	-0.00953588
0	0	0	0	0	0	0	0	0	0	0	0	0	0	0	0	0	0
0.00273905	0.0127706	0.00273905	0.0151117	0.00273905	0.012926	0.00273905	0.0117328	0.00273905	0.0174855	0.00273905	0.0142243	0.00273905	0.0134123	0.00273905	0.00924667	0.00273905	0.00953587
0.0109262	0.0266027	0.0109262	0.0293774	0.0109262	0.026296	0.0109262	0.0248013	0.0109262	0.0309518	0.0109262	0.0278525	0.0109262	0.0292863	0.0109262	0.0197753	0.0109262	0.0202449
0.0244717	0.04013	0.0244717	0.0438513	0.0244717	0.0403507	0.0244717	0.0384011	0.0244717	0.0447039	0.0244717	0.0407379	0.0244717	0.0452491	0.0244717	0.0303625	0.0244717	0.0311644
0.0432273	0.0526813	0.0432273	0.0571685	0.0432273	0.0542798	0.0432273	0.052321	0.0432273	0.0577088	0.0432273	0.05295	0.0432273	0.0598026	0.0432273	0.0403884	0.0432273	0.0414276
0.0669873	0.0643238	0.0669873	0.0694139	0.0669873	0.0674208	0.0669873	0.0658553	0.0669873	0.0698379	0.0669873	0.0652344	0.0669873	0.0723984	0.0669873	0.04951	0.0669873	0.0505307
0.0954915	0.0746125	0.0954915	0.0805248	0.0954915	0.0790314	0.0954915	0.0784444	0.0954915	0.0808896	0.0954915	0.0773328	0.0954915	0.0832038	0.0954915	0.057371	0.0954915	0.0583035
0.128428	0.0836158	0.128428	0.0896035	0.128428	0.0889481	0.128428	0.0894281	0.128428	0.0908698	0.128428	0.0882083	0.128428	0.092636	0.128428	0.0638972	0.128428	0.0646155
0.165435	0.091127	0.165435	0.0965708	0.165435	0.0972411	0.165435	0.0983722	0.165435	0.0997858	0.165435	0.097503	0.165435	0.100563	0.165435	0.0689117	0.165435	0.0694253
0.206107	0.097265	0.206107	0.101381	0.206107	0.103734	0.206107	0.105103	0.206107	0.107278	0.206107	0.105174	0.206107	0.106531	0.206107	0.0724564	0.206107	0.0727319
0.25	0.102083	0.25	0.104053	0.25	0.108289	0.25	0.110161	0.25	0.113028	0.25	0.110809	0.25	0.110222	0.25	0.0744311	0.25	0.0745813
0.296632	0.1053	0.296632	0.104714	0.296632	0.111072	0.296632	0.113709	0.296632	0.116158	0.296632	0.114214	0.296632	0.11192	0.296632	0.0749858	0.296632	0.0750317
0.345491	0.106813	0.345491	0.103395	0.345491	0.111697	0.345491	0.115398	0.345491	0.116922	0.345491	0.115183	0.345491	0.112111	0.345491	0.0741151	0.345491	0.0741903
0.396044	0.106358	0.396044	0.100252	0.396044	0.110203	0.396044	0.114776	0.396044	0.115665	0.396044	0.113468	0.396044	0.110678	0.396044	0.0720046	0.396044	0.0721923
0.447736	0.103392	0.447736	0.095655	0.447736	0.106243	0.447736	0.111643	0.447736	0.113099	0.447736	0.109187	0.447736	0.10727	0.447736	0.0687396	0.447736	0.069137
0.5	0.0978255	0.5	0.0896644	0.5	0.100357	0.5	0.106056	0.5	0.108053	0.5	0.102916	0.5	0.10135	0.5	0.064526	0.5	0.0651752
0.552264	0.0903709	0.552264	0.0824612	0.552264	0.0926071	0.552264	0.0984593	0.552264	0.100393	0.552264	0.0949397	0.552264	0.092958	0.552264	0.059492	0.552264	0.0604579
0.603956	0.0811524	0.603956	0.0737994	0.603956	0.0835861	0.603956	0.0891434	0.603956	0.0902834	0.603956	0.085247	0.603956	0.083131	0.603956	0.0538688	0.603956	0.0551393
0.654508	0.070932	0.654508	0.0641948	0.654508	0.0738173	0.654508	0.078382	0.654508	0.078786	0.654508	0.0740439	0.654508	0.0724072	0.654508	0.0478071	0.654508	0.0493777
0.703368	0.0600993	0.703368	0.0539793	0.703368	0.0636942	0.703368	0.0655039	0.703368	0.0665249	0.703368	0.0622558	0.703368	0.0612467	0.703368	0.0415707	0.703368	0.0433685
0.75	0.0492368	0.75	0.0441955	0.75	0.0538331	0.75	0.0520506	0.75	0.0539549	0.75	0.0509081	0.75	0.050231	0.75	0.035311	0.75	0.03728
0.793893	0.0392847	0.793893	0.0353668	0.793893	0.0444367	0.793893	0.0397194	0.793893	0.0426568	0.793893	0.0408726	0.793893	0.0400952	0.793893	0.0292683	0.793893	0.0313312
0.834565	0.0307664	0.834565	0.0282789	0.834565	0.0358759	0.834565	0.0294912	0.834565	0.0338256	0.834565	0.032629	0.834565	0.0315171	0.834565	0.0235877	0.834565	0.0256712
0.871572	0.0237868	0.871572	0.0225956	0.871572	0.0284919	0.871572	0.0217473	0.871572	0.0266962	0.871572	0.0259421	0.871572	0.0243014	0.871572	0.0184997	0.871572	0.0204401
0.904508	0.0183588	0.904508	0.018164	0.904508	0.0225419	0.904508	0.0162976	0.904508	0.0206555	0.904508	0.0205509	0.904508	0.018616	0.904508	0.0140941	0.904508	0.0156871
0.933013	0.0145687	0.933013	0.0144736	0.933013	0.0181545	0.933013	0.0125552	0.933013	0.0155272	0.933013	0.0159692	0.933013	0.0142328	0.933013	0.0102751	0.933013	0.0114286
0.956773	0.0115976	0.956773	0.0114273	0.956773	0.0144188	0.956773	0.00998551	0.956773	0.0113276	0.956773	0.0121685	0.956773	0.0109267	0.956773	0.00694722	0.956773	0.0074263
0.975528	0.00915068	0.975528	0.00883572	0.975528	0.0111315	0.975528	0.00818458	0.975528	0.00804781	0.975528	0.00911166	0.975528	0.00844825	0.975528	0.00387463	0.975528	0.00390735
0.989074	0.00683968	0.989074	0.00667875	0.989074	0.00792912	0.989074	0.0066973	0.989074	0.00542417	0.989074	0.00706397	0.989074	0.00641889	0.989074	0.00142631	0.989074	0.00147184
0.997261	0.00375224	0.997261	0.00409956	0.997261	0.00484832	0.997261	0.00400636	0.997261	0.0026609	0.997261	0.00428898	0.997261	0.00373073	0.997261	0.000207655	0.997261	0.000302969
1	0	1	0	1	0	1	0	1	0	1	0	1	0	1	0	1	0

## Sheet: Fluke's Section #6
B. acutorostrata fluke Section #6		D. delphis fluke Section #6		G. melas fluke Section #6		L. acutus fluke Section #6		L. albirostris fluke Section #6		P. phocoena tail fluke Section #6		T. truncatus fluke Section #6		E477 AIRFOIL 15%		S1048 AIRFOIL 15%
X_Coord	Y_Coord	X_Coord	Y_Coord	X_Coord	Y_Coord	X_Coord	Y_Coord	X_Coord	Y_Coord	X_Coord	Y_Coord	X_Coord	Y_Coord	X_Coord	Y_Coord	X_Coord	Y_Coord
1	0	1	0	1	0	1	0	1	0	1	0	1	0	1	0	1	0
0.997261	-0.00399078	0.997261	-0.0063428	0.997261	-0.00333743	0.997261	-0.00470663	0.997261	-0.00566414	0.997261	-0.00535111	0.997261	-0.00693079	0.997261	-0.000185812	0.997261	-0.000142236
0.989074	-0.00638202	0.989074	-0.0108624	0.989074	-0.00710756	0.989074	-0.00948844	0.989074	-0.0105643	0.989074	-0.00950772	0.989074	-0.0125377	0.989074	-0.000924083	0.989074	-0.000884048
0.975528	-0.00835796	0.975528	-0.0145288	0.975528	-0.0113371	0.975528	-0.0143529	0.975528	-0.0132533	0.975528	-0.0124117	0.975528	-0.0168645	0.975528	-0.00251581	0.975528	-0.00255274
0.956773	-0.0109959	0.956773	-0.017486	0.956773	-0.0160926	0.956773	-0.0197444	0.956773	-0.0163604	0.956773	-0.0158466	0.956773	-0.0212403	0.956773	-0.00490774	0.956773	-0.0047046
0.933013	-0.0143547	0.933013	-0.0210217	0.933013	-0.0213636	0.933013	-0.0255836	0.933013	-0.0201188	0.933013	-0.0199999	0.933013	-0.0255352	0.933013	-0.00786732	0.933013	-0.00735598
0.904508	-0.0185108	0.904508	-0.0250209	0.904508	-0.0272824	0.904508	-0.031686	0.904508	-0.024427	0.904508	-0.0247437	0.904508	-0.0303447	0.904508	-0.0114947	0.904508	-0.0106792
0.871572	-0.0233338	0.871572	-0.0295038	0.871572	-0.0340059	0.871572	-0.0378352	0.871572	-0.0292294	0.871572	-0.0299736	0.871572	-0.0355121	0.871572	-0.0159477	0.871572	-0.0147116
0.834565	-0.0287807	0.834565	-0.034568	0.834565	-0.0414353	0.834565	-0.0437119	0.834565	-0.0344673	0.834565	-0.035523	0.834565	-0.0408198	0.834565	-0.0212323	0.834565	-0.0194111
0.793893	-0.0347962	0.793893	-0.0399163	0.793893	-0.0491155	0.793893	-0.0496287	0.793893	-0.0401088	0.793893	-0.0410909	0.793893	-0.0461085	0.793893	-0.0272881	0.793893	-0.0247553
0.75	-0.041269	0.75	-0.0454353	0.75	-0.0568039	0.75	-0.0553205	0.75	-0.0461019	0.75	-0.0465413	0.75	-0.0514772	0.75	-0.0339689	0.75	-0.0306618
0.703368	-0.048367	0.703368	-0.0511749	0.703368	-0.064194	0.703368	-0.0601029	0.703368	-0.0521373	0.703368	-0.0520977	0.703368	-0.0568248	0.703368	-0.0410223	0.703368	-0.0370144
0.654508	-0.0557663	0.654508	-0.0568105	0.654508	-0.0709241	0.654508	-0.0642857	0.654508	-0.0579483	0.654508	-0.0582434	0.654508	-0.0620388	0.654508	-0.0480785	0.654508	-0.0436542
0.603956	-0.062955	0.603956	-0.0621912	0.603956	-0.076797	0.603956	-0.0678523	0.603956	-0.0634086	0.603956	-0.064369	0.603956	-0.0670477	0.603956	-0.0548152	0.603956	-0.05035
0.552264	-0.0696204	0.552264	-0.0671734	0.552264	-0.0815741	0.552264	-0.0708186	0.552264	-0.0684236	0.552264	-0.0698874	0.552264	-0.0718881	0.552264	-0.0609321	0.552264	-0.0567299
0.5	-0.0754863	0.5	-0.0716276	0.5	-0.0852307	0.5	-0.0731263	0.5	-0.072812	0.5	-0.0742395	0.5	-0.0760789	0.5	-0.0661865	0.5	-0.0625444
0.447736	-0.0796953	0.447736	-0.0753184	0.447736	-0.0876054	0.447736	-0.0748994	0.447736	-0.0760028	0.447736	-0.0775945	0.447736	-0.0794026	0.447736	-0.0703682	0.447736	-0.0675362
0.396044	-0.0825305	0.396044	-0.0781618	0.396044	-0.0887208	0.396044	-0.0761709	0.396044	-0.0779095	0.396044	-0.0800179	0.396044	-0.0815643	0.396044	-0.0732805	0.396044	-0.0714696
0.345491	-0.0841958	0.345491	-0.0800817	0.345491	-0.0885258	0.345491	-0.0764837	0.345491	-0.0787086	0.345491	-0.0813853	0.345491	-0.0826577	0.345491	-0.0747974	0.345491	-0.0740832
0.296632	-0.0845418	0.296632	-0.0809478	0.296632	-0.0869392	0.296632	-0.0753595	0.296632	-0.0784179	0.296632	-0.0815208	0.296632	-0.0827146	0.296632	-0.0748277	0.296632	-0.0751495
0.25	-0.0834861	0.25	-0.0803928	0.25	-0.0839289	0.25	-0.0724699	0.25	-0.0768705	0.25	-0.080313	0.25	-0.0818982	0.25	-0.0733277	0.25	-0.0744945
0.206107	-0.0813238	0.206107	-0.0782693	0.206107	-0.079609	0.206107	-0.0683095	0.206107	-0.074028	0.206107	-0.0777133	0.206107	-0.0802661	0.206107	-0.0702946	0.206107	-0.0720316
0.165435	-0.0775674	0.165435	-0.074672	0.165435	-0.0738585	0.165435	-0.0629463	0.165435	-0.0702493	0.165435	-0.0737802	0.165435	-0.0777192	0.165435	-0.0657985	0.165435	-0.0677989
0.128428	-0.0721836	0.128428	-0.0698635	0.128428	-0.0668819	0.128428	-0.0565862	0.128428	-0.0656888	0.128428	-0.0681921	0.128428	-0.0737716	0.128428	-0.0599264	0.128428	-0.0619037
0.0954915	-0.0650562	0.0954915	-0.0638948	0.0954915	-0.0587494	0.0954915	-0.0495136	0.0954915	-0.06007	0.0954915	-0.0613692	0.0954915	-0.0680152	0.0954915	-0.0528152	0.0954915	-0.0545276
0.0669873	-0.0564393	0.0669873	-0.0563408	0.0669873	-0.0498726	0.0669873	-0.0419056	0.0669873	-0.0533006	0.0669873	-0.0531295	0.0669873	-0.060454	0.0669873	-0.0446446	0.0669873	-0.0459185
0.0432273	-0.0463498	0.0432273	-0.0484233	0.0432273	-0.0405711	0.0432273	-0.0339394	0.0432273	-0.0452042	0.0432273	-0.0439855	0.0432273	-0.0509071	0.0432273	-0.0356392	0.0432273	-0.0364058
0.0244717	-0.0351256	0.0244717	-0.038099	0.0244717	-0.0312706	0.0244717	-0.0256749	0.0244717	-0.0357292	0.0244717	-0.0339111	0.0244717	-0.0394625	0.0244717	-0.0260987	0.0244717	-0.026412
0.0109262	-0.0234348	0.0109262	-0.0273359	0.0109262	-0.0215224	0.0109262	-0.017186	0.0109262	-0.0248699	0.0109262	-0.0232	0.0109262	-0.0265347	0.0109262	-0.016438	0.0109262	-0.0164464
0.00273905	-0.0118896	0.00273905	-0.0168263	0.00273905	-0.0111776	0.00273905	-0.00861187	0.00273905	-0.012848	0.00273905	-0.0112893	0.00273905	-0.0133493	0.00273905	-0.00727737	0.00273905	-0.00730606
0	0	0	0	0	0	0	0	0	0	0	0	0	0	0	0	0	0
0.00273905	0.0118896	0.00273905	0.0168263	0.00273905	0.0111776	0.00273905	0.00861187	0.00273905	0.012848	0.00273905	0.0112893	0.00273905	0.0133493	0.00273905	0.00727737	0.00273905	0.00730606
0.0109262	0.0234348	0.0109262	0.0273359	0.0109262	0.0215224	0.0109262	0.017186	0.0109262	0.0248699	0.0109262	0.0232	0.0109262	0.0265347	0.0109262	0.016438	0.0109262	0.0164464
0.0244717	0.0351256	0.0244717	0.038099	0.0244717	0.0312706	0.0244717	0.0256749	0.0244717	0.0357292	0.0244717	0.0339111	0.0244717	0.0394625	0.0244717	0.0260987	0.0244717	0.026412
0.0432273	0.0463498	0.0432273	0.0484233	0.0432273	0.0405711	0.0432273	0.0339394	0.0432273	0.0452042	0.0432273	0.0439855	0.0432273	0.0509071	0.0432273	0.0356392	0.0432273	0.0364058
0.0669873	0.0564393	0.0669873	0.0563408	0.0669873	0.0498726	0.0669873	0.0419056	0.0669873	0.0533006	0.0669873	0.0531295	0.0669873	0.060454	0.0669873	0.0446446	0.0669873	0.0459185
0.0954915	0.0650562	0.0954915	0.0638948	0.0954915	0.0587494	0.0954915	0.0495136	0.0954915	0.06007	0.0954915	0.0613692	0.0954915	0.0680152	0.0954915	0.0528152	0.0954915	0.0545276
0.128428	0.0721836	0.128428	0.0698635	0.128428	0.0668819	0.128428	0.0565862	0.128428	0.0656888	0.128428	0.0681921	0.128428	0.0737716	0.128428	0.0599264	0.128428	0.0619037
0.165435	0.0775674	0.165435	0.074672	0.165435	0.0738585	0.165435	0.0629463	0.165435	0.0702493	0.165435	0.0737802	0.165435	0.0777192	0.165435	0.0657985	0.165435	0.0677989
0.206107	0.0813238	0.206107	0.0782693	0.206107	0.079609	0.206107	0.0683095	0.206107	0.074028	0.206107	0.0777133	0.206107	0.0802661	0.206107	0.0702946	0.206107	0.0720316
0.25	0.0834861	0.25	0.0803928	0.25	0.0839289	0.25	0.0724699	0.25	0.0768705	0.25	0.080313	0.25	0.0818982	0.25	0.0733277	0.25	0.0744945
0.296632	0.0845418	0.296632	0.0809478	0.296632	0.0869392	0.296632	0.0753595	0.296632	0.0784179	0.296632	0.0815208	0.296632	0.0827146	0.296632	0.0748277	0.296632	0.0751495
0.345491	0.0841958	0.345491	0.0800817	0.345491	0.0885258	0.345491	0.0764837	0.345491	0.0787086	0.345491	0.0813853	0.345491	0.0826577	0.345491	0.0747974	0.345491	0.0740832
0.396044	0.0825305	0.396044	0.0781618	0.396044	0.0887208	0.396044	0.0761709	0.396044	0.0779095	0.396044	0.0800179	0.396044	0.0815643	0.396044	0.0732805	0.396044	0.0714696
0.447736	0.0796953	0.447736	0.0753184	0.447736	0.0876054	0.447736	0.0748994	0.447736	0.0760028	0.447736	0.0775945	0.447736	0.0794026	0.447736	0.0703682	0.447736	0.0675362
0.5	0.0754863	0.5	0.0716276	0.5	0.0852307	0.5	0.0731263	0.5	0.072812	0.5	0.0742395	0.5	0.0760789	0.5	0.0661865	0.5	0.0625444
0.552264	0.0696204	0.552264	0.0671734	0.552264	0.0815741	0.552264	0.0708186	0.552264	0.0684236	0.552264	0.0698874	0.552264	0.0718881	0.552264	0.0609321	0.552264	0.0567299
0.603956	0.062955	0.603956	0.0621912	0.603956	0.076797	0.603956	0.0678523	0.603956	0.0634086	0.603956	0.064369	0.603956	0.0670477	0.603956	0.0548152	0.603956	0.05035
0.654508	0.0557663	0.654508	0.0568105	0.654508	0.0709241	0.654508	0.0642857	0.654508	0.0579483	0.654508	0.0582434	0.654508	0.0620388	0.654508	0.0480785	0.654508	0.0436542
0.703368	0.048367	0.703368	0.0511749	0.703368	0.064194	0.703368	0.0601029	0.703368	0.0521373	0.703368	0.0520977	0.703368	0.0568248	0.703368	0.0410223	0.703368	0.0370144
0.75	0.041269	0.75	0.0454353	0.75	0.0568039	0.75	0.0553205	0.75	0.0461019	0.75	0.0465413	0.75	0.0514772	0.75	0.0339689	0.75	0.0306618
0.793893	0.0347962	0.793893	0.0399163	0.793893	0.0491155	0.793893	0.0496287	0.793893	0.0401088	0.793893	0.0410909	0.793893	0.0461085	0.793893	0.0272881	0.793893	0.0247553
0.834565	0.0287807	0.834565	0.034568	0.834565	0.0414353	0.834565	0.0437119	0.834565	0.0344673	0.834565	0.035523	0.834565	0.0408198	0.834565	0.0212323	0.834565	0.0194111
0.871572	0.0233338	0.871572	0.0295038	0.871572	0.0340059	0.871572	0.0378352	0.871572	0.0292294	0.871572	0.0299736	0.871572	0.0355121	0.871572	0.0159477	0.871572	0.0147116
0.904508	0.0185108	0.904508	0.0250209	0.904508	0.0272824	0.904508	0.031686	0.904508	0.024427	0.904508	0.0247437	0.904508	0.0303447	0.904508	0.0114947	0.904508	0.0106792
0.933013	0.0143547	0.933013	0.0210217	0.933013	0.0213636	0.933013	0.0255836	0.933013	0.0201188	0.933013	0.0199999	0.933013	0.0255352	0.933013	0.00786732	0.933013	0.00735598
0.956773	0.0109959	0.956773	0.017486	0.956773	0.0160926	0.956773	0.0197444	0.956773	0.0163604	0.956773	0.0158466	0.956773	0.0212403	0.956773	0.00490774	0.956773	0.0047046
0.975528	0.00835796	0.975528	0.0145288	0.975528	0.0113371	0.975528	0.0143529	0.975528	0.0132533	0.975528	0.0124117	0.975528	0.0168645	0.975528	0.00251581	0.975528	0.00255274
0.989074	0.00638202	0.989074	0.0108624	0.989074	0.00710756	0.989074	0.00948844	0.989074	0.0105643	0.989074	0.00950772	0.989074	0.0125377	0.989074	0.000924083	0.989074	0.000884048
0.997261	0.00399078	0.997261	0.0063428	0.997261	0.00333743	0.997261	0.00470663	0.997261	0.00566414	0.997261	0.00535111	0.997261	0.00693079	0.997261	0.000185812	0.997261	0.000142236
1	0	1	0	1	0	1	0	1	0	1	0	1	0	1	0	1	0
